# Supplementary material for: The AIM2 inflammasome is activated in astrocytes during the late phase of EAE
Source: PubMed Central journal article supplement (PMC9089781; doi:10.1172/jci.insight.155563), 2022-04-22
Supplement: jciinsight-7-155563-s019.pdf [file jciinsight-7-155563-s019.pdf]

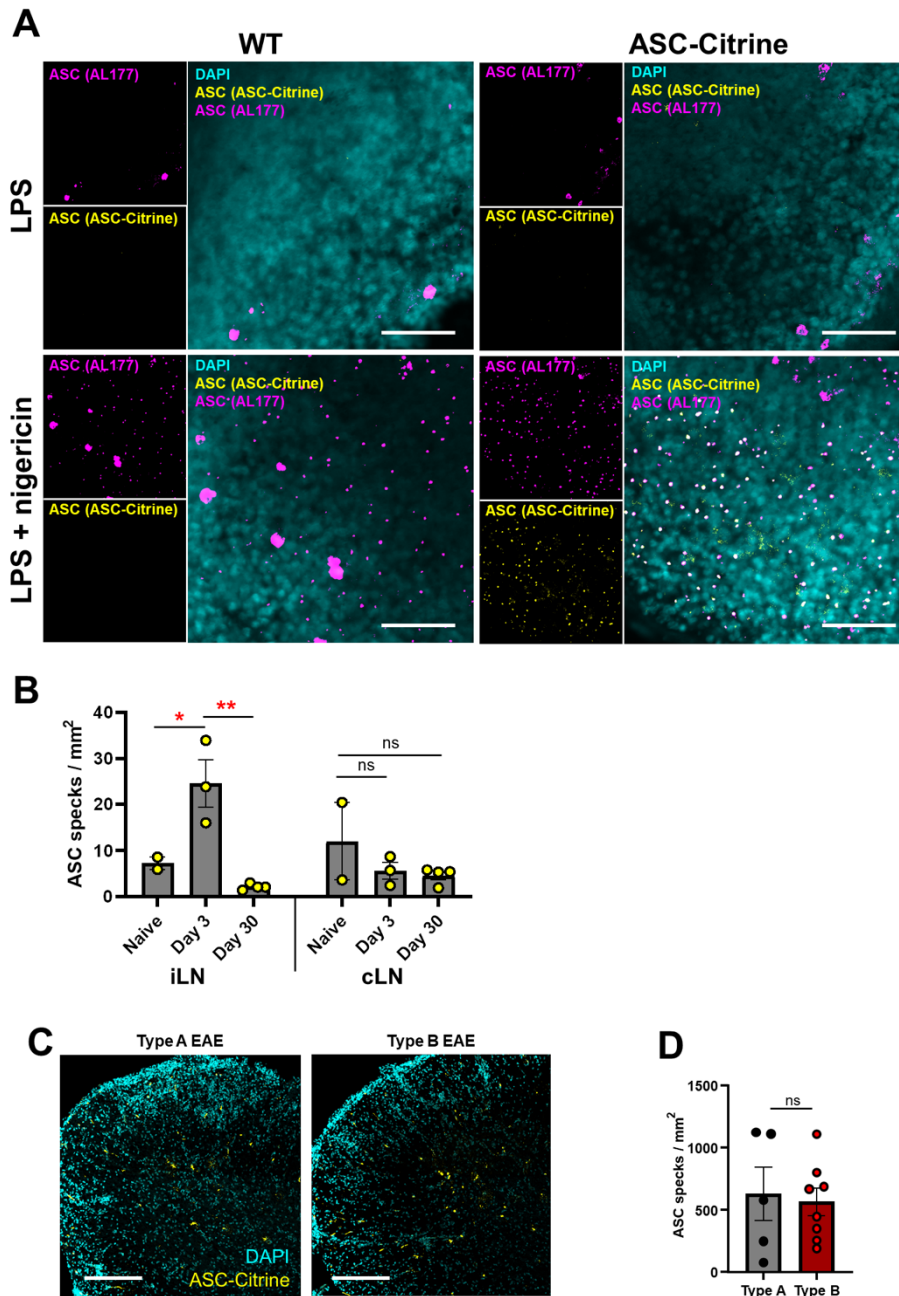

**Supplemental Figure 1. Validation of ASC-Citrine system in tissue imaging. (A)** Representative images of ASC speck formation detected with ASC-Citrine and ASC antibody signals. Live spleen tissue culture slices from naïve WT and ASC-Citrine mice were used with NLRP3 inflammasome stimulation. Scale bar is 50  $\mu\text{m}$ . **(B)** Quantification of ASC specks in the iLNs and cLNs of ASC-Citrine mice during EAE. Each datapoint represents a value of an average value from two cross-sections of LNs (25  $\mu\text{m}$  thickness) from one mouse. One-way ANOVA,  $p=0.0021$  (iLN),  $p=0.3235$  (cLN), with Dunnett's multiple comparisons test. **(C and D)** Comparison of ASC speck images and numbers in SC between Type-A and Type-B EAE. Representative images (C) and quantification (D) of ASC specks in the SC of ASC-Citrine mice at 30-dpi for Type A ( $n=5$ ) and Type B ( $n=8$ ) EAE. Each datapoint represents a value from one mouse. Mann-Whitney test was used (D). Scale bar is 200  $\mu\text{m}$ . (B, D) ns; not significant ( $p>0.05$ ), \* $p<0.05$ , \*\* $p<0.01$ . Error bars denote mean  $\pm$  SEM (B, D).

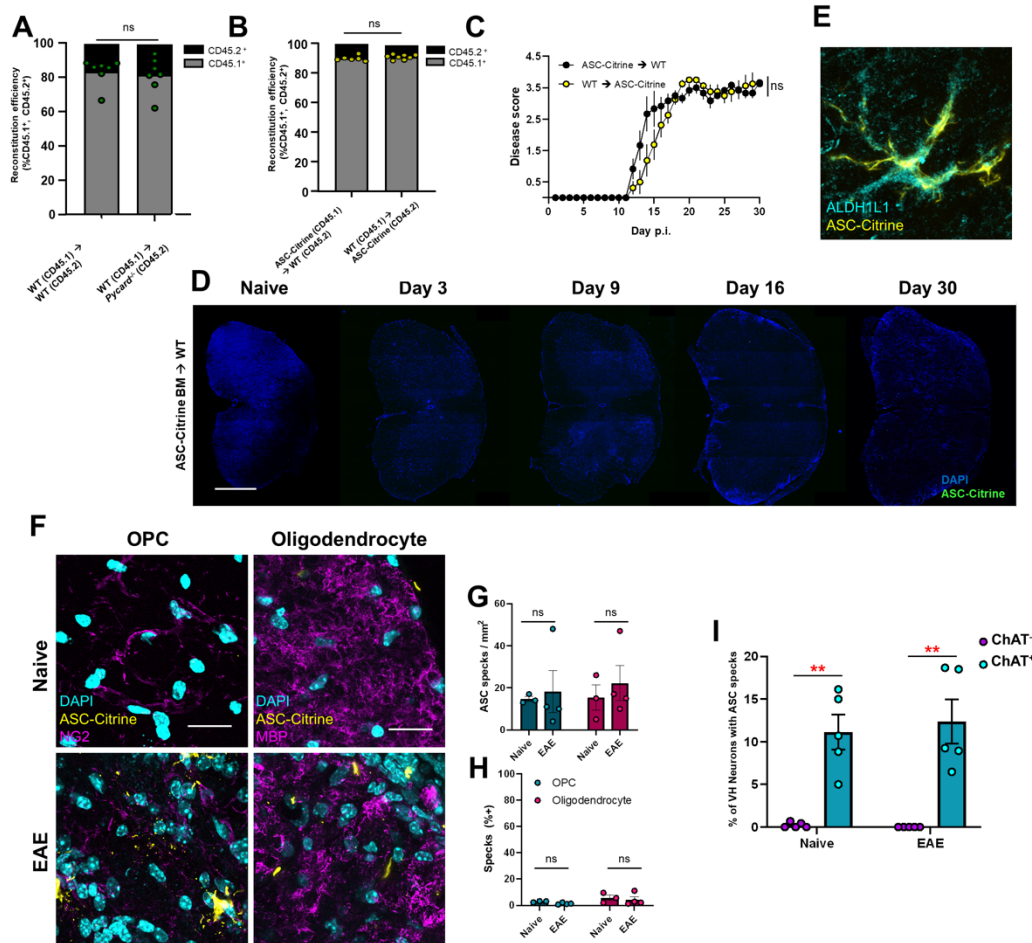

**Supplemental Figure 2. Validation of Bone Marrow Chimeras.** (A) BM chimera were created by transferring WT BM cells to irradiated WT or *Pycard*<sup>-/-</sup> recipients ( $n=7$  for each group). Reconstitution efficiency of BM chimeras determined by flow cytometry, quantified as % of total CD45<sup>+</sup> cells in peripheral blood for congenic markers of CD45.1 (donor) or CD45.2 (recipient). Each datapoint represents a value from one mouse. Mann-Whitney test used. (B and C) BM chimera were created by transferring ASC-Citrine BM cells irradiated WT recipients (ASC-Citrine  $\rightarrow$  WT,  $n=6$ ) and vice versa (WT  $\rightarrow$  ASC-Citrine mice,  $n=8$ ). Reconstitution efficiency (B) and EAE disease score (C) of indicated BM chimera. Each datapoint represents a value from one mouse (B). Each datapoint denotes mean EAE score per group, and Mann-Whitney test of total AUC was used for statistical evaluation (C). (D) Representative images of SC from WT recipients reconstituted with ASC-Citrine BM cells at indicated time points during EAE. No apparent ASC specks were observed. Scale bar is 500  $\mu\text{m}$ . (E) Representative image of ALDH1L1 counterstaining of astrocytes in ASC-Citrine mice at 30-dpi EAE. Scale bar is 10  $\mu\text{m}$ . (F) Representative images of ASC specks and strings counter-stained with antibodies against NG2 (for OPCs) and MBP (for mature oligodendrocytes) in SC from naive versus 30-dpi EAE ASC-Citrine mice. Scale bar is 20  $\mu\text{m}$ . (G) Quantification of ASC specks in OPCs and mature oligodendrocytes of SC from naive versus 30-dpi EAE ASC-Citrine mice. Each datapoint represents a value from one mouse. Two-way repeated measures (RM) ANOVA was used (main effect of cell type:  $^{ns}p<0.7807$ ). (H) Percentages of ASC specks detected in OPC or mature oligodendrocytes out of total ASC specks per section. L5 spinal cords at 30-dpi EAE were used for the analysis. (I) Percentage of ChAT<sup>+</sup> and ChAT<sup>-</sup> VH neurons containing ASC specks in SC from naive vs. 30-dpi EAE ASC-Citrine mice. Each datapoint represents a value from one mouse ( $n=5$ ). Two-way RM ANOVA was used (main effect of cell type:  $p<0.001$ ) with Sidak's multiple comparisons test post hoc. *ns*; not significant ( $p>0.05$ ),  $^{**}p<0.01$ . Error bars denote mean  $\pm$  SEM (A, B, G-I).

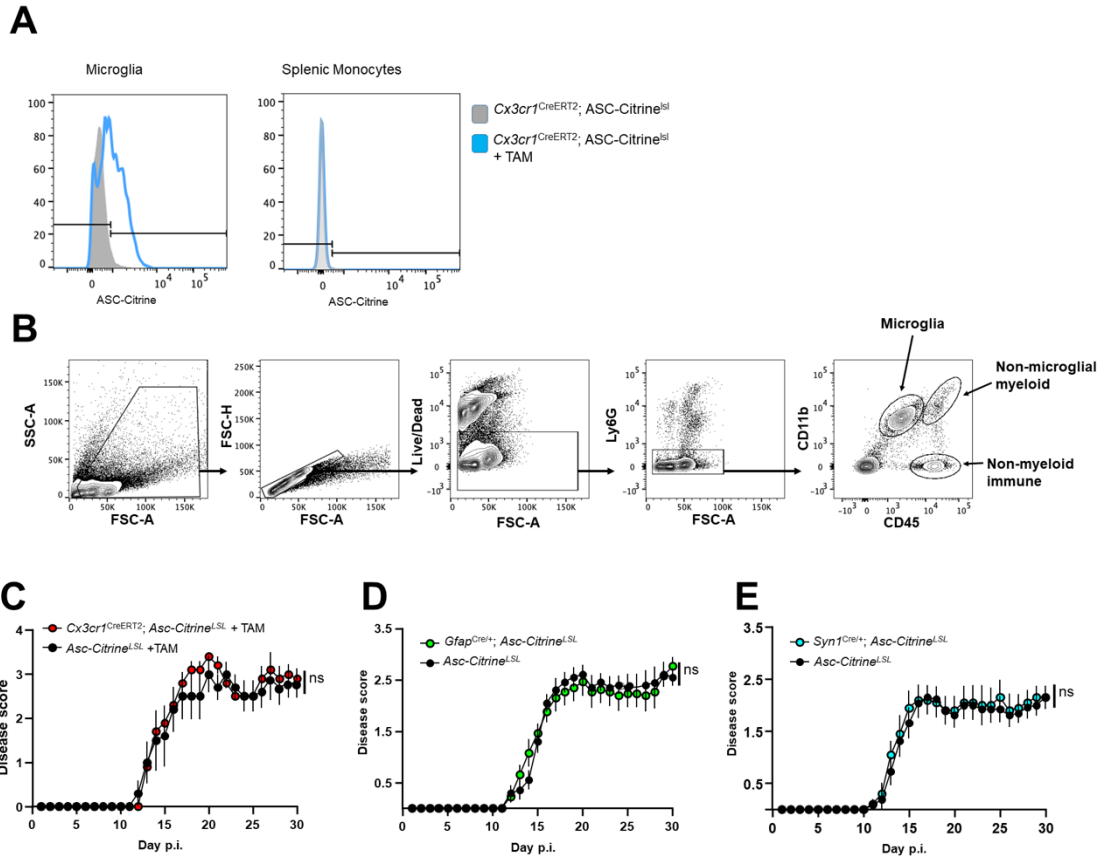

**Supplemental Figure 3. Validation of EAE mice with cell type-specific ASC-Citrine expression.** (A) Flow cytometry histograms showing tamoxifen-mediated expression of ASC-citrine reporter expression in microglia and splenic monocytes from *Cx3cr1<sup>CreERT2</sup>;Asc-Citrine<sup>LSL</sup>* mice with or without tamoxifen (TAM) treatment. (B) Flow cytometry gating strategy for identifying microglia. (C) EAE disease score of *Cx3cr1<sup>CreERT2</sup>;Asc-Citrine<sup>LSL</sup>* ( $n=5$ ) vs. *Cx3cr1<sup>CreERT2</sup>;Asc-Citrine<sup>LSL</sup>* ( $n=5$ ) mice. Both groups were treated with TAM. (D and E) EAE disease score of *Asc-Citrine<sup>LSL</sup>* ( $n=10$ ) vs. *Gfap<sup>Cre</sup>;Asc-Citrine<sup>LSL</sup>* ( $n=13$ ) (D) and *Asc-Citrine<sup>LSL</sup>* ( $n=13$ ) vs. *Syn1<sup>Cre</sup>;Asc-Citrine<sup>LSL</sup>* ( $n=10$ ) (E). Mann-Whitney test of total AUC of disease score was used for statistical analysis (C, D, E). ns; not significant ( $p>0.05$ ). Each datapoint denotes mean EAE score per group with an error bar of mean  $\pm$  SEM (C-E).

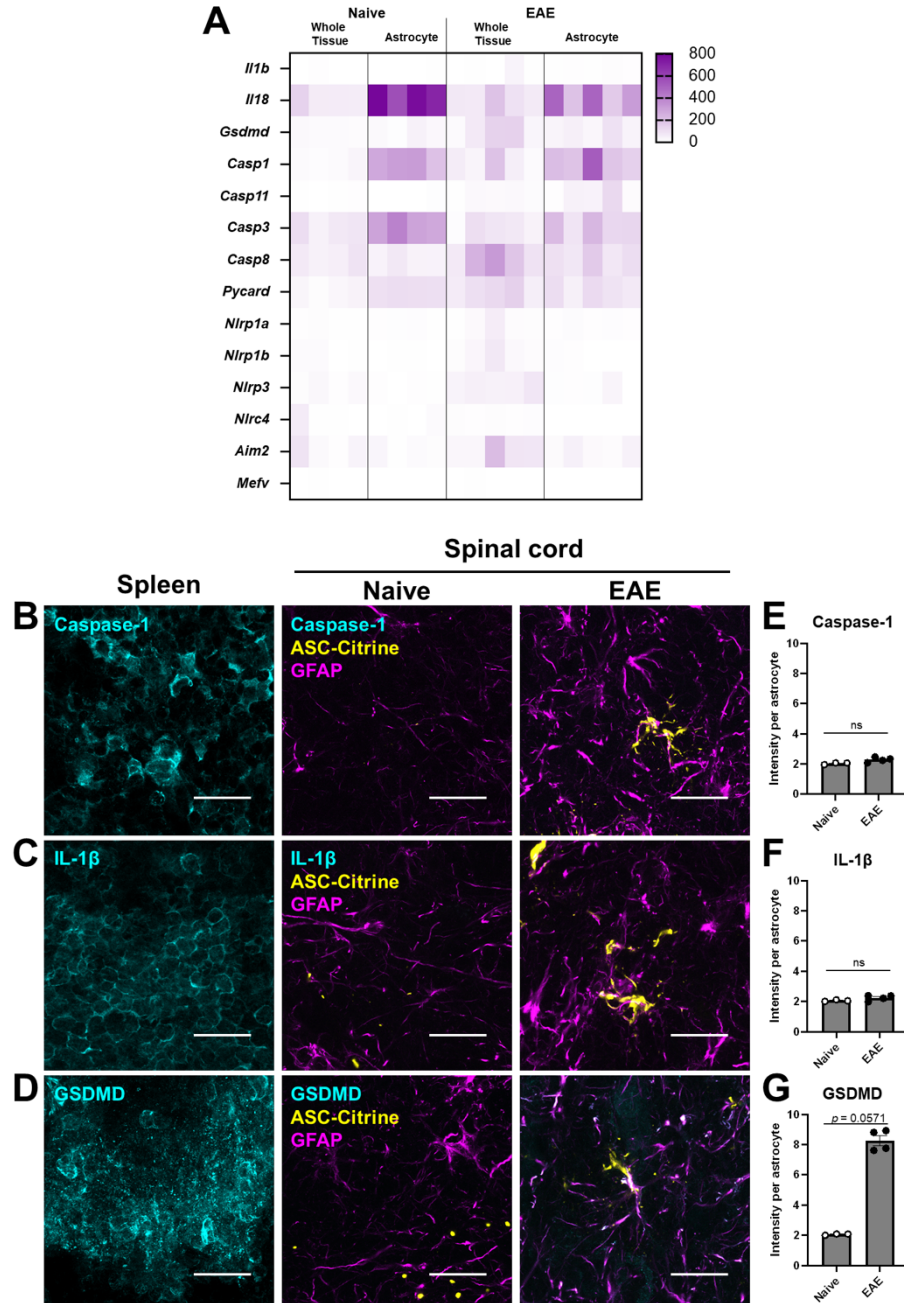

**Supplemental Figure 4. Expression of inflammasome components and cell death markers in astrocytes during EAE.** (A) Gene-set enrichment analysis of inflammasome-associated genes in bulk SC lysates and astrocytes (with astrocyte-specific Ribotag-HA enriched RNA) in naïve and 30-dpi EAE mice. Data represented as raw transcript counts derived from publicly available data (GEO Accession #: GSE100329). (B-G) Representative images (B-D) and quantification (E-G) of caspase-1 (B, E), IL-1β (C, F), and GSDMD (D, G) expression in spleen and SC astrocytes from naïve versus 30-dpi EAE ASC-Citrine mice. Scale bar is 20 μm. Each datapoint represents a value from one mouse. Individual astrocytes were identified using the Imaris software and the mean intensity per cell was quantified for caspase-1 (E), IL-1β (F) and GSDMD (G). Mann-Whitney test was used. (E-G) ns; not significant ( $p > 0.05$ ). Error bars denote mean  $\pm$  SEM (E-G).

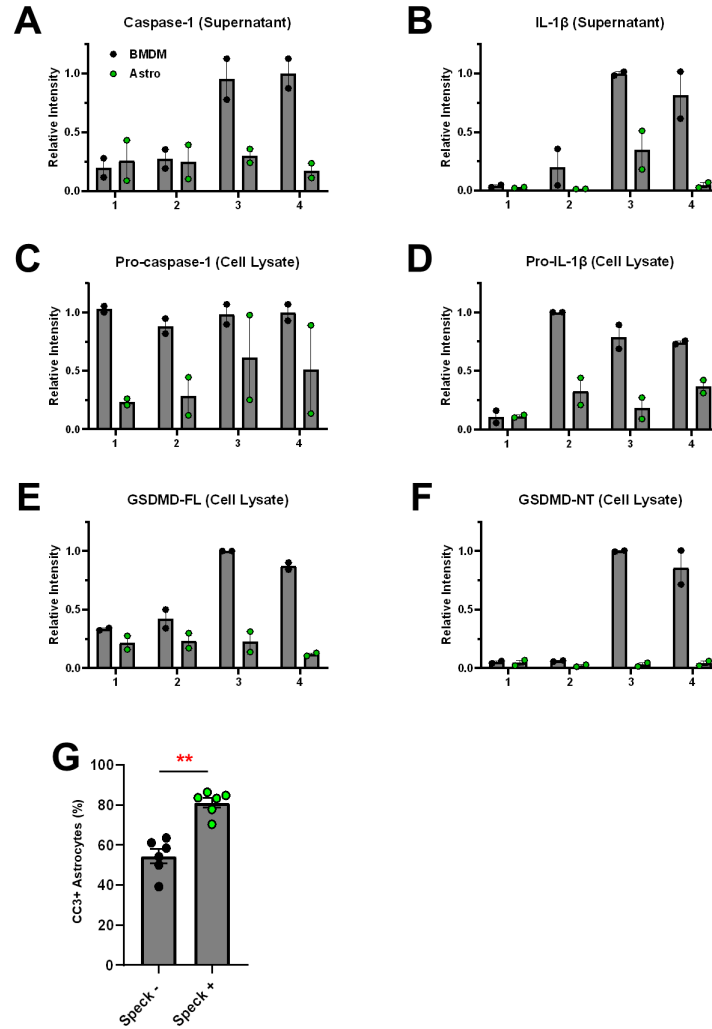

**Supplemental Figure 5. Expression of inflammasome components in primary cortical astrocyte cell line (A and B)** WB quantitative evaluation of culture supernatant samples of mature caspase-1 (A) and IL-1 $\beta$  (B). (C-F) WB quantitative evaluation of cell lysate samples of pro-caspase-1 (C), pro-IL-1 $\beta$  (D), GSDMD-FL (E), and GSDMD-NT (F). In (A-F), Cells in group 1 were unstimulated. Cells in group 2 were treated with Ultrapure LPS alone. Cells in groups 3 and 4 were pre-treated with Ultrapure LPS, and were further stimulated with nigericin and poly(dA:dT)/liposome to activate the NLRP3 and AIM2 inflammasomes, respectively. (G) Quantification of active caspase-3 (CC3) in spinal cord astrocytes comparing astrocytes with or without ASC specks in *Gfap<sup>Cre</sup>;Asc-Citrine<sup>LSL</sup>* ( $n=6$ ) mice at 30-dpi EAE. Each datapoint represents a value from one mouse. Individual astrocytes were identified using the Imaris software and were quantified by CC3 puncta staining. Mann-Whitney test was used.  $**p<0.01$ . Error bars denote mean  $\pm$  SEM.

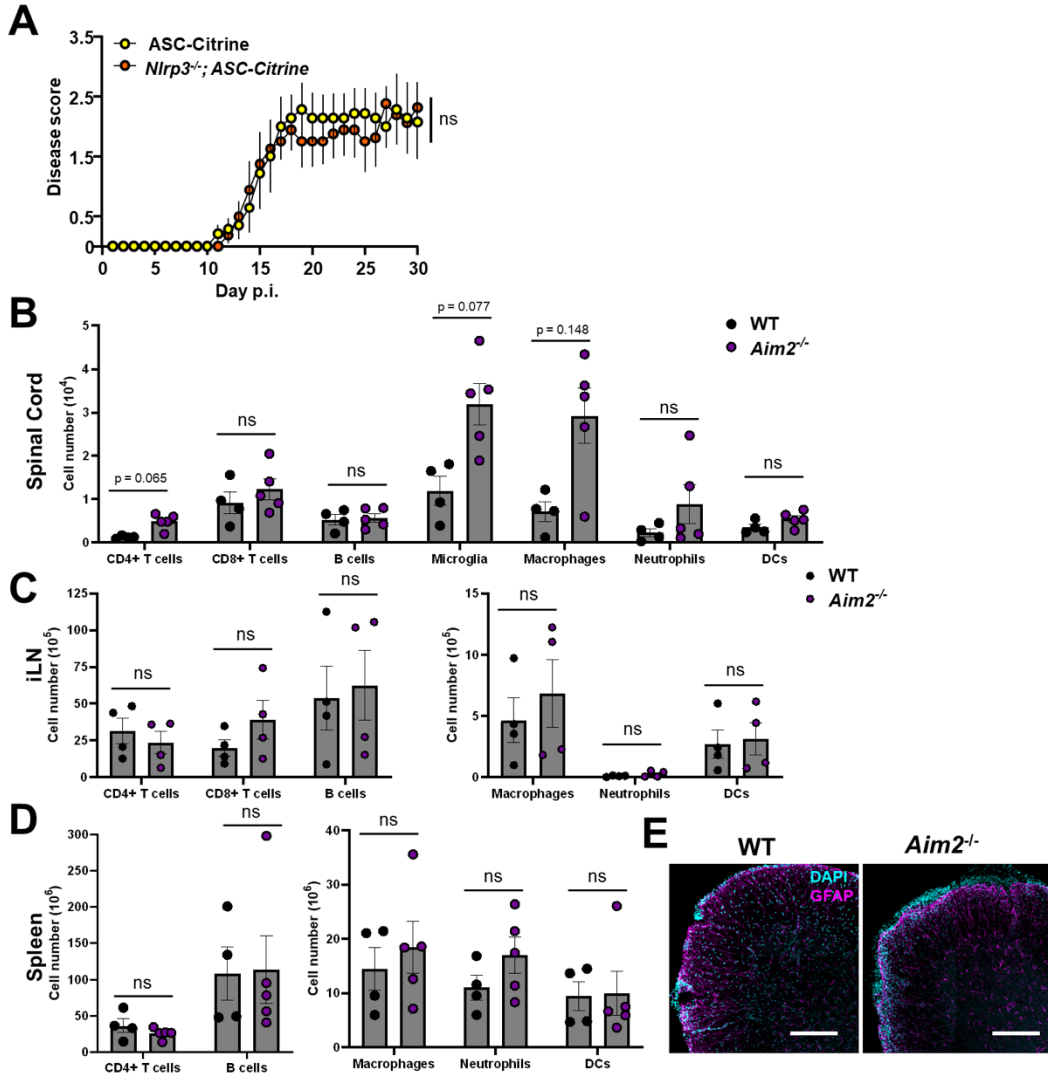

**Fig. S6. Validation of EAE phenotype of *Nlrp3*<sup>-/-</sup>;ASC-Citrine mice and immune phenotype of *Aim2*<sup>-/-</sup> mice with EAE. (A)** EAE disease score of ASC-Citrine ( $n=7$ ) vs. *Nlrp3*<sup>-/-</sup>;ASC-Citrine ( $n=8$ ) mice with Type B-EAE. Mann-Whitney test of total AUC for disease score was used. Each datapoint denotes mean EAE score per group with an error bar of mean  $\pm$  SEM. **(B–D)** Leukocyte counts in SC (B), iLN (C) and spleen (D) at 16-dpi EAE in WT vs. *Aim2*<sup>-/-</sup> mice induced with Type-A EAE. Each datapoint represents a value from one mouse Error bars denote mean  $\pm$  SEM. Two-way RM ANOVA was used with Sidak’s multiple comparisons test post hoc. **(E)** Representative image of GFAP staining in SC from WT versus *Aim2*<sup>-/-</sup> mice at 30-dpi of EAE. Scale bar is 200  $\mu$ m. ns; not significant ( $p>0.05$ ) (A-D).
