# Supplementary material for: The AIM2 inflammasome is activated in astrocytes during the late phase of EAE
Source: PubMed Central journal article supplement (PMC9089781; doi:10.1172/jci.insight.155563), 2022-04-22
Supplement: jciinsight-7-155563-s020.pdf [file jciinsight-7-155563-s020.pdf]

785  
786

**Table S1. Reagent information for antibody-based techniques**

787

| Target            | Cat #            | Species | Clone             | Supplier                    | Dilution | Technique                       |
|-------------------|------------------|---------|-------------------|-----------------------------|----------|---------------------------------|
| ASC               | AG-25B-0006-C100 | Rabbit  | AL177, polyclonal | Adipogen                    | 1:500    | IF Imaging                      |
| Tmem119           | ab209064         | Rabbit  | 28-3              | Abcam                       | 1:500    | IF Imaging                      |
| GFAP              | 13-0300          | Rat     | 2.2B10            | Invitrogen                  | 1:500    | IF Imaging,<br>Western Blotting |
| ALDHL1            | ab87117          | Rabbit  | polyclonal        | Abcam                       | 1:500    | IF Imaging                      |
| NeuN              | ab104225         | Rabbit  | polyclonal        | Abcam                       | 1:500    | IF Imaging                      |
| ChAT              | AB144P           | Goat    | polyclonal        | EMD Millipore               | 1:100    | IF Imaging                      |
| NG2               | ab275024         | Rabbit  | EPR23976-145      | Abcam                       | 1:500    | IF Imaging                      |
| MBP               | ab218011         | Rabbit  | EPR21188          | Abcam                       | 1:500    | IF Imaging                      |
| Iba1              | NB100-1028       | Goat    | polyclonal        | Novus Biologicals           | 1:500    | IF Imaging                      |
| C3d               | AF2655           | Goat    | polyclonal        | R&D Systems                 | 1:500    | IF Imaging                      |
| Cleaved caspase-3 | 9664S            | Rabbit  | 5AIE              | Cell Signaling Technologies | 1:500    | IF Imaging                      |
| Caspase-1         | N/A              | Rat     | 4b4               | Genentech                   | 1:500    | IF Imaging,<br>Western Blotting |
| Gasdermin D       | PA5-1155330      | Rabbit  | polyclonal        | ThermoFisher Scientific     | 1:500    | IF Imaging                      |
| Gasdermin D       | ab209845         | Rabbit  | EPR19828          | Abcam                       | 1:500    | Western Blotting                |
| IL-1 $\beta$      | AF-401-NA        | Goat    | polyclonal        | R&D Systems                 | 1:1000   | IF Imaging,<br>Western Blotting |
| IL-18             | 210-401-323      | Rabbit  | polyclonal        | Rockland                    | 1:1000   | Western Blotting                |
| CD45.1            | 110708           | Mouse   | A20               | Biolegend                   | 1:200    | Flow Cytometry                  |
| CD45.2            | 109831           | Mouse   | 104               | Biolegend                   | 1:200    | Flow Cytometry                  |

788  
789  
790

791  
792

**Table S2. Sequences of primers used for RT-qPCR assays**

| Gene         | Direction | Sequence                               | 793 |
|--------------|-----------|----------------------------------------|-----|
| <i>Actb</i>  | Forward   | TGT TAC CAA CTG GGA CGA CA             |     |
|              | Reverse   | CTG GGT CAT CTT TTC ACG GT             |     |
| <i>Casp1</i> | Forward   | GAA GGC CCA TAT AGA GAA AGA TTT TAT TG |     |
|              | Reverse   | GAC AGG ATG TCT CCA AGA CAC ATT        |     |
| <i>Gsdmd</i> | Forward   | GCG ATC TCA TTC CGG TGG ACA G          |     |
|              | Reverse   | TTC CCA TCG ACG ACA TCA GAG AC         |     |
| <i>Il1b</i>  | Forward   | CGC AGC AGC ACA TCA ACA AGA GC         |     |
|              | Reverse   | TGT CCT CAT CCT GGA AGG TCC ACG        |     |
| <i>Il18</i>  | Forward   | CAG GCC TGA CAT CTT CTG CAA            |     |
|              | Reverse   | CTG ACA TGG CAG CCA TTG T              |     |

794  
795  
796  
797
